# Supplementary material
Source: Research Square preprint supplement (doi:10.21203/rs.3.rs-10114957/v1)
Supplement: Supplementary file 1 [file 6143c505a719e282586b8d58.docx]

Table 4. Thermal classification of individual months and years at the H. Arctowski station in the years 1977-2025

| Year | J | F | | M | A | M | J | | J | A | S | O | | N | D | YEAR |
| --- | --- | --- | --- | --- | --- | --- | --- | --- | --- | --- | --- | --- | --- | --- | --- | --- |
| 1977 | *1.4* | *1.5* | | *0.3* | *0.0* | *-4.3* | *-7.6* | | *-11.6* | *-6.3* | *-5.9* | *-3.0* | | *-0.2* | *1.1* | *-2.9* |
| 1978 | 2.1 | 2.5 | | 0.9 | -0.4 | 0.0 | -5.1 | | -11.6 | -6.9 | -2.4 | -1.2 | | -1.1 | 1.0 | -1.9 |
| 1979 | 3.3 | 2.4 | | 2.0 | 0.6 | -2.6 | -4.9 | | -3.8 | -4.9 | -2.4 | -2.0 | | -0.4 | 1.7 | -0.9 |
| 1980 | 2.3 | 1.9 | | 0.2 | -4.7 | -2.9 | -6.5 | | -12.2 | -11.2 | -7.5 | -2.2 | | -2.2 | 1.5 | -3.6 |
| 1981 | 1.7 | 2.5 | | 0.4 | 0.0 | -3.5 | -3.6 | | -4.2 | -9.3 | -4.6 | -3.7 | | -0.5 | 1.3 | -2 |
| 1982 | 3.7 | 2.6 | | 1.5 | 0.7 | -0.5 | -2.3 | | -7.3 | -5.4 | -3.4 | -2.8 | | -1.3 | 1.5 | -1.1 |
| 1983 | 1.9 | 1.3 | | *0.8* | 0.3 | -3.1 | -4.8 | | -4.5 | -2.1 | -3.7 | -1.6 | | 0.7 | 1.8 | -1.1 |
| 1984 | 1.2 | 2.4 | | 1.6 | -1.4 | -6.3 | -4.5 | | -3.7 | -2.7 | -0.4 | -2.5 | | 0.4 | 2.0 | -1.2 |
| 1985 | 2.9 | 2.3 | | -0.5 | -0.3 | -3.5 | -3.9 | | -2.1 | -2.8 | -0.7 | -0.4 | | 1.0 | 1.8 | -0.5 |
| 1986 | 1.7 | 1.5 | | 1.8 | -1.4 | -7.8 | -7.7 | | -8.1 | -6.7 | -5.0 | -1.4 | | -1.7 | 0.8 | -2.8 |
| 1987 | 1.6 | 1.8 | | 1.3 | -2.6 | -5.4 | -7.5 | | -13.2 | -4.1 | -5.6 | -1.5 | | 1.0 | 2.1 | -2.7 |
| 1988 | 1.5 | 3.4 | | 0.7 | -0.7 | -1.4 | -7.1 | | -5.4 | -8.3 | -3.1 | -2.8 | | -1.3 | 0.5 | -2 |
| 1989 | 2.2 | 3.2 | | 3.2 | -4.7 | 0.1 | -1.5 | | 0.5 | -1.5 | -2.4 | 0.0 | | 0.7 | 1.5 | 0.1 |
| 1990 | 2.2 | 3.6 | | 1.2 | -5.3 | -6.0 | -5.3 | | -6.5 | -6.1 | -2.9 | -2.0 | | -1.2 | 0.3 | -2.3 |
| 1991 | *3.1* | *1.5* | | *-0.2* | *-3.0* | *-9.5* | *-10.5* | | *-6.0* | *-6.7* | *-2.8* | *-3.1* | | *-0.4* | *0.0* | *-3.1* |
| 1992 | 3.0 | 1.5 | | -1.0 | -0.6 | -8.5 | -8.5 | | -6.7 | -3.6 | -1.9 | -2.6 | | 0.8 | 3.4 | -2.1 |
| 1993 | *1.6* | *2.5* | | *0.5* | *-0.8* | *-2.6* | *-4.4* | | *-3.5* | *-3.7* | *-3.7* | *-1.6* | | *0.1* | *0.8* | *-1.2* |
| 1994 | *2.1* | *2.0* | | *1.0* | *-1.4* | *-5.7* | *-4.9* | | *-11.7* | *-3.6* | *-3.0* | *-6.5* | | *0.4* | 2.2 | -2.4 |
| 1995 | 3.8 | 3.2 | | 0.5 | -1.1 | -2.0 | -6.4 | | -13.0 | -11.0 | -5.8 | -0.4 | | 0.1 | 2.1 | -2.5 |
| 1996 | 2.4 | 3.4 | | 2.0 | -1.1 | -2.3 | -4.9 | | -3.1 | -3.4 | -1.0 | -0.9 | | 0.3 | 1.7 | -0.6 |
| 1997 | 3.5 | 2.6 | | 2.2 | -1.5 | -0.3 | -5.6 | | -6.3 | -4.6 | -6.3 | -2.7 | | -1.4 | *1.4* | -1.6 |
| 1998 | *2.4* | *2.4* | | *1.5* | *1.4* | *-1.6* | *-1.6* | | *-5.2* | *-6.4* | *-7.4* | *-1.7* | | *0.0* | *1.1* | *-1.3* |
| 1999 | 3.0 | 2.8 | | 2.4 | 2.0 | 0.2 | -3.3 | | -3.1 | -4.9 | -4.9 | -0.7 | | 1.4 | 1.9 | -0.3 |
| 2000 | *2.1* | *2.7* | | *1.6* | *0.4* | *-1.0* | *-2.0* | | *-2.8* | *-6.7* | *-5.6* | *-1.2* | | *-0.7* | *0.7* | *-1* |
| 2001 | *1.6* | *0.9* | | *0.1* | *-3.4* | *-1.0* | *-6.7* | | *-7.6* | *-2.3* | *-1.7* | *-0.1* | | *0.7* | *2.0* | *-1.5* |
| 2002 | *2.7* | *3.1* | | *0.3* | *0.6* | *-5.7* | *-9.7* | | *-6.6* | *-3.8* | *-2.7* | *-5.0* | | *-1.0* | *1.0* | *-2.2* |
| 2003 | *1.7* | *2.5* | | *-0.1* | *-0.3* | *-2.3* | *-7.9* | | *-6.5* | *-1.6* | *-2.1* | *-1.6* | | *-1.4* | *-0.6* | *-1.7* |
| 2004 | *1.7* | *2.4* | | *1.2* | *-1.5* | *-2.2* | *-2.9* | | *-3.6* | *-3.6* | *-3.2* | *-1.8* | | *0.3* | *1.0* | *-1.0* |
| 2005 | *1.9* | *2.7* | | *0.4* | *-1.6* | *-5.0* | *-9.3* | | *-7.2* | *-3.6* | *-1.9* | *-0.7* | | *0.2* | *0.7* | *-2.0* |
| 2006 | 3.7 | 3.2 | | 3.3 | -0.3 | -0.2 | -3.7 | | -3.8 | -8.4 | -4.2 | 0.3 | | *-0.2* | *1.3* | -0.8 |
| 2007 | *2.3* | *2.3* | | *-1.0* | *-4.8* | *-5.6* | *-8.7* | | *-12.1* | *-5.2* | *-3.4* | *-3.3* | | *-1.8* | *1.2* | -3.3 |
| 2008 | *2.3* | 2.8 | | 1.4 | -1.5 | -1.2 | -3.0 | | *-3.4* | *-4.0* | *0.6* | *-0.2* | | *1.0* | 2.0 | -0.3 |
| 2009 | 3.1 | 2.3 | | *2.2* | *-1.3* | -2.7 | -7.2 | | -8.9 | -8.8 | -3.9 | *-1.8* | | *-2.0* | *0.4* | -2.4 |
| 2010 | *0.7* | *0.4* | | *0.2* | *-2.3* | *-3.0* | *-2.3* | | *-4.2* | *-3.9* | *-2.5* | *0.2* | | *1.2* | *0.2* | *-1.3* |
| 2011 | *1.3* | *3.1* | | *1.0* | *-4.6* | *-3.4* | *-6.3* | | *-10.5* | *-8.1* | *-5.7* | *-0.8* | | *-0.1* | *1.6* | *-2.7* |
| 2012 | 2.4 | 2.0 | | 2.1 | -2.9 | -1.6 | -5.6 | | -4.9 | -3.2 | -4.1 | -2.2 | | -0.3 | 0.2 | -1.5 |
| 2013 | 1.1 | 1.7 | | 1.5 | 1.9 | -3.5 | -3.8 | | -6.1 | -7.6 | -4.6 | -1.7 | | -1.1 | -0.8 | -1.9 |
| 2014 | 0.7 | 0.3 | | -0.2 | -0.7 | -2.2 | -4.7 | | -2.4 | -5.2 | -4.1 | -2.0 | | -1.9 | 0.0 | -1.9 |
| 2015 | 1.4 | 2.2 | | 1.2 | 0.4 | -2.0 | -6.9 | | -7.8 | -5.4 | -7.6 | -1.6 | | -1.3 | 0.5 | -2.2 |
| 2016 | 1.2 | 1.4 | | 1.9 | -2.6 | -0.6 | -1.1 | | -3.9 | -6.4 | -0.5 | -0.2 | | 0.0 | 0.6 | -0.9 |
| 2017 | 1.6 | 2.6 | | 1.6 | -1.0 | -1.8 | -5.6 | | -3.7 | -5.4 | -3.4 | -2.4 | | -0.3 | 1.3 | -1.4 |
| 2018 | 2.2 | 3.3 | | 1.5 | -0.2 | -1.8 | -4.2 | | -3.6 | -3.7 | -2.5 | -1.5 | | 0.5 | 1.7 | -0.7 |
| 2019 | 1.4 | 0.8 | | 1.2 | -0.3 | -3.3 | -3.9 | | -4.2 | -4.8 | -3.7 | -2.1 | | 0.5 | 0.7 | -1.5 |
| 2020 | 3.1 | 3.1 | | 1.5 | 0.3 | -1.7 | -3.1 | | -3.9 | -7.7 | -4.4 | -2.3 | | 1.1 | 1.8 | -1 |
| 2021 | 2.5 | 3.0 | | 2.0 | 0.1 | -1.1 | -1.9 | | -4.1 | -4.2 | -0.4 | 0.0 | | 1.3 | 2.0 | -0.1 |
| 2022 | 2.0 | 2.6 | | 0.8 | -0.4 | -2.1 | -2.7 | | -3.4 | -1.8 | -0.5 | -0.6 | | 2.0 | 1.7 | -0.2 |
| 2023 | 3.4 | 2.5 | | 2.0 | 0.7 | 0.2 | -4.0 | | -3.2 | -3.5 | -4.9 | -2.6 | | -0.1 | 1.4 | -0.7 |
| 2024 | 1.7 | 3.3 | | 1.0 | -0.4 | -3.0 | -5.0 | | -4.6 | -6.5 | -3.7 | -2.2 | | 0.6 | 1.6 | -1.4 |
| 2025 | 2.8 | 1.1 | | 1.7 | 2.4 | -1.6 | -2.2 | | -0.9 | -2.3 | -1.3 | -1.6 | | -1.3 | 0.5 | -0.2 |
| Thermal classifications of months and years according to Lorenc and Suwalska-Bogucka (1996) | | | | | | | | | | | | | | | | |
| Rating | | | Criterion | | | | | Rating | | | | | Criterion | | | | |
| Extremely warm | | | T>2.5STD | | | | | Slightly cool | | | | | -0.50STD < T ≤ -1.0STD | | | | |
| Abnormally warm | | | 2.0STD < T ≤ 2.5STD | | | | | Cool | | | | | -1.0STD < T ≤ -1.5STD | | | | |
| Very warm | | | 1.5STD < T ≤ 2.0STD | | | | | Very cool | | | | | -1.5STD < T ≤ -2.0STD | | | | |
| Warm | | | 1.0STD < T ≤ 1.5STD | | | | | Abnormally cool | | | | | -2.0STD < T ≤ -2.5STD | | | | |
| Slightly warm | | | 0.50STD < T ≤ 1.5STD | | | | | Extremely cool | | | | | T < -2.5STD | | | | |
| Normal | | | 0.50STD < T ≤ -0.5STD | | | | |  | | | | |  | | | | |

Explanations: Values ​​in italics were reconstructed based on daily data from the ERA5 reanalysis. T – multi-year mean monthly or annual air temperature, STD – standard deviation plus multi-year mean air temperature (norm).
